RESEARCH ARTICLE

# Distribution and community composition of lichens on mature mangroves (*Avicennia marina* subsp. *australasica* (Walp.) J. Everett) in New Zealand

Christy L. Reynolds<sup>1‡a</sup>, Orhan A. H. Er<sup>1‡b</sup>, Linton Winder<sup>2</sup>, Dan J. Blanchon<sup>1\*</sup>

**1** Biodiversity Management and Animal Welfare Research Group, Environmental and Animal Sciences, Unitec Institute of Technology, Auckland, New Zealand, **2** Department of Forestry and Resource Management, Toi Ohomai Institute of Technology, Rotorua, New Zealand

‡a Current address: Greenscene New Zealand Ltd, Auckland, New Zealand.

‡b Current address: Arborlab Consultancy Services, Auckland, New Zealand.

\* [dblanchon@unitec.ac.nz](mailto:dblanchon@unitec.ac.nz)

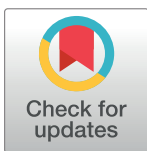

**OPEN ACCESS**

**Citation:** Reynolds CL, Er OAH, Winder L, Blanchon DJ (2017) Distribution and community composition of lichens on mature mangroves (*Avicennia marina* subsp. *australasica* (Walp.) J. Everett) in New Zealand. PLoS ONE 12(6): e0180525. <https://doi.org/10.1371/journal.pone.0180525>

**Editor:** Judi Hewitt, University of Waikato, NEW ZEALAND

**Received:** December 22, 2016

**Accepted:** June 17, 2017

**Published:** June 30, 2017

**Copyright:** © 2017 Reynolds et al. This is an open access article distributed under the terms of the [Creative Commons Attribution License](https://creativecommons.org/licenses/by/4.0/), which permits unrestricted use, distribution, and reproduction in any medium, provided the original author and source are credited.

**Data Availability Statement:** All relevant data are within the paper and its Supporting Information files. Voucher specimens deposited in public herbarium (UNITEC).

**Funding:** This work was supported by the Unitec Institute of Technology internal fund (no number). The funder had no role in study design, data collection and analysis, decision to publish, or preparation of the manuscript.

## Abstract

Mangrove forests of a single trees species, *Avicennia marina* subsp. *australasica* are widespread in the upper North Island of New Zealand, but there is little available information on the diversity of epiphytes such as lichens within them. A survey of 200 trees from 20 mangrove sites recorded a total of 106 lichen species from 45 genera. Two of these species are considered to be ‘Threatened’, five ‘At Risk’ and 27 ‘Data Deficient’. Multiple regression indicated that tree diameter (DBH) and mean annual rain days positively influenced site species richness. Multidimensional scaling showed that sites from the same geographical region generally formed distinct clusters. Redundancy analysis indicated that mean annual wet days, latitude and DBH measurably influenced species composition.

## Introduction

The term “mangrove” covers a range of halophytic evergreen plants comprising over 70 species, found in 27 genera from 20 families and nine orders [1–4]. About a quarter of all mangrove species belong to the pantropical genus *Avicennia* [1]. The only mangrove species currently found in New Zealand is the Mānawa (*Avicennia marina* subsp. *australasica*), which is also found in Southeastern Australia [5]. Mangrove forests are distributed throughout the globe in 118 tropical and sub-tropical countries [6], ranging from 31°45’N in southern Japan, to 38°03’S in the North Island of New Zealand. In New Zealand, the species is naturally distributed from the top of the North Island to Kāwhia on the west coast and Ohiwa on the east coast [5].

Mangrove ecosystems occur at the convergence of terrestrial and marine communities [2], receiving saline and fresh water, sediment, and nutrient inputs from both the ocean and rivers [4]. Worldwide, mangroves are highly productive ecosystems [3, 7, 8] that provide habitat and an important source of nutrients for a variety of species [9, 10]. Mangroves are valuable nursery grounds and breeding sites for birds, fish, crustaceans, shellfish, reptiles and mammals [8].

**Competing interests:** The authors have declared that no competing interests exist.

They provide habitats for motile or visiting fauna, and support coastal fisheries through the provision of nursery areas [11]. Mangroves also filter sediment and contaminant runoff from the land into the sea, act as carbon sinks, and can store more carbon than freshwater wetlands [4, 12]. Whilst the biodiversity value of mangroves is well accepted worldwide [3, 11, 13], there is an admitted shortfall of information on the biodiversity status of New Zealand mangrove forests [14]. The State of New Zealand's Environment Report [15] described New Zealand mangroves as being “*low in diversity*”, although 30 fish species are noted as being associated with mangroves and a wide range of native and introduced birds are known to utilize them as habitat [14]. Some terrestrial invertebrates have been recorded from mangroves in New Zealand. This includes several moth species, including *Planotortrix avicenniae*, a mite (*Acalitus avicenniae*), the lemon tree borer (*Oemona hirta*) and several ant species [14]. Despite several international studies describing epiphytic plant and/or lichen diversity on mangroves [13, 16–18], there is very little published information on epiphytes of mangroves in New Zealand. One study [19] recorded 32 lichen species from mangroves on Great Barrier Island and another [20] reported 33 species at Miranda in the Firth of Thames, but, both of these studies were small-scale and not quantitative. One threatened species, the ‘Nationally Endangered’ *Ramalina pacifica* is mainly found in mangrove forest in New Zealand [21].

Worldwide, over 90% of mangroves are found within the territory of developing countries [22]. Since the 1980s at least 35% of mangrove forests have been lost, mainly due to human influences [23, 24]. The main causes of mangrove loss are considered to be mariculture, logging for timber, and removal for the establishment of agricultural systems [10, 23, 25]. In contrast to the global trend of loss, mangroves in New Zealand have been steadily spreading [5, 26, 27]. This spread is attributed to increased sedimentation caused by erosion from urbanization and agricultural development [9]. This has led to public submissions for removal of mangroves [5], some of which have occurred [28].

Whilst a number of lichen species have been recorded from New Zealand mangroves [29, 30], no systematic study has been carried out on the diversity of lichens epiphytic on *Avicennia marina* subsp. *australasica*. We therefore conducted a study of the species richness, abundance and community composition of lichens in association with mangrove forest at 20 sites across its range in the upper North Island of New Zealand. We compared these assemblages with environmental and site factors in order to develop an understanding of variables that may influence their distribution.

## Methods

### Site selection

Sites were chosen from harbour areas throughout the range of *Avicennia marina* subsp. *australasica* in New Zealand (Fig 1). The sites represented four distinct areas of the upper North Island: the Far North; Coromandel Peninsula; Kaipara Harbour and mid Northland; and Auckland. The study focused on larger mature mangroves with significant trunks, as these are more likely to host epiphytes than younger saplings and shrubs with dense canopies. Sites were selected to provide representative regional spread, but, were only included if they were both accessible and contained a minimum of 40 trees (in order to provide a large enough parent population for randomised tree selection). Permission was sought from land owners to access any site.

### Lichen sampling

Ten trees at each site were randomly selected from those present and mean DBH was recorded at each site (Table 1). Lichen species observed on each individual tree sampled were recorded

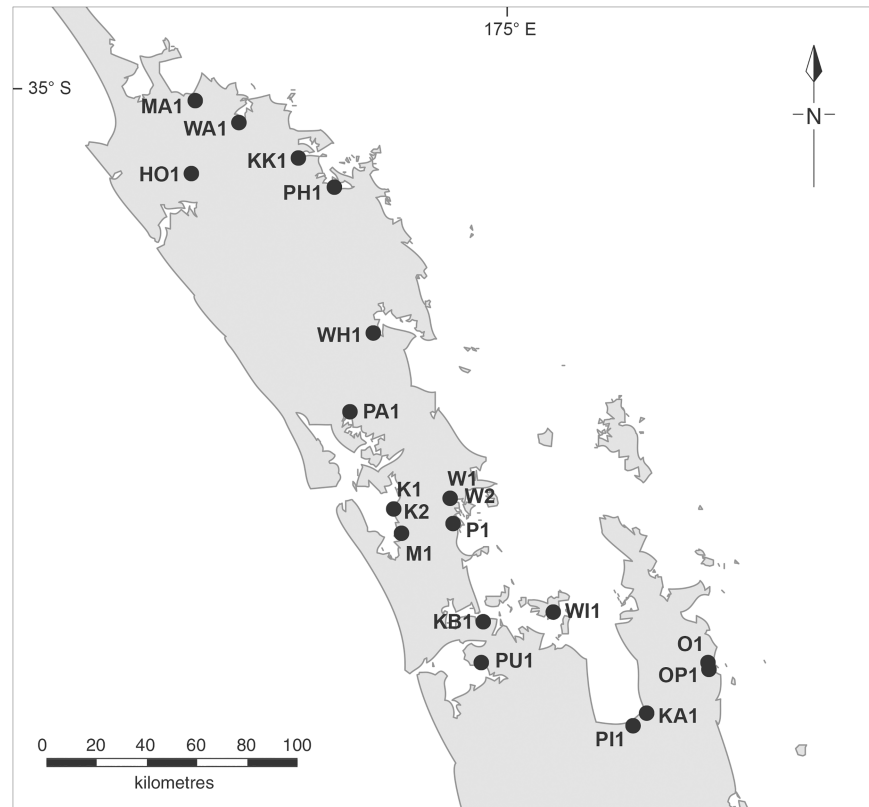

**Fig 1. Mangrove study sites, North Island, New Zealand.**

<https://doi.org/10.1371/journal.pone.0180525.g001>

(from ground level to the top of the canopy), by careful visual observation to account for any vertical zonation of different species [31]. Frequency of occurrence for a given species at a site was estimated by calculating the proportion of trees that were hosts. A single tree was considered to be a host if at least a single thallus was observed. Voucher specimens of all lichen species present were collected (where possible) and accessioned into the Unitec Herbarium. Nomenclature follows the last Flora treatment and recent updates for individual genera [21, 30, 32–34].

### Environmental and site variables

Longitude and latitude were recorded for each of the 20 sites. Climate variables were determined from annual means (1981–2010) from the nearest weather station (taken from the NIWA CliFlo database) and comprised: mean daily minimum and maximum air temperature (°C), mean annual rainfall (mm), mean annual rain days ( $\geq 0.1$  mm of rain), and mean annual wet days ( $\geq 1.0$  mm of rain) (Table 1). The percentage mangrove canopy cover for each site was also determined using recent aerial photographs.

### Data analysis

As a preliminary analysis, species accumulation curves were plotted to determine whether sampling was sufficient to adequately represent species composition. Species accumulation curves were generated using the “Sample Interpolation” method available in the package Species Diversity and Richness (version 4.1.2). This analysis indicated that ten samples were able

**Table 1. Summary of environmental and other variables.**

| Location   | Site                  | Canopy Cover % | Latitude   | Longitude  | Min temp °C | Max temp °C | Mean temp °C | Mean annual rain days | Mean annual wet days | Mean annual rainfall (mm) | Mean DBH mm | Number of spp./site |
|------------|-----------------------|----------------|------------|------------|-------------|-------------|--------------|-----------------------|----------------------|---------------------------|-------------|---------------------|
| Far North  | Hokianga (HO)         | 68             | -35.272066 | 173.522483 | 11.8        | 19.5        | 15.7         | 198.67                | 163.11               | 1394.1                    | 219.6       | 36                  |
|            | Whangaroa (WA)        | 84             | -35.084144 | 173.719894 | 11.8        | 19.5        | 15.7         | 182.50                | 132.13               | 1394.1                    | 159.2       | 28                  |
|            | Mangonui (MA)         | 46             | -35.012327 | 173.560641 | 11.8        | 19.5        | 15.7         | 182.50                | 132.13               | 1394.1                    | 216.8       | 29                  |
|            | Kerikeri (KK)         | 87             | -35.217416 | 173.985469 | 10.6        | 20.1        | 15.3         | 201.46                | 131.64               | 1709.8                    | 231.9       | 33                  |
|            | Paihia (PH)           | 82             | -35.304761 | 174.101969 | 10.6        | 20.1        | 15.3         | 201.46                | 131.64               | 1709.8                    | 147.7       | 30                  |
| Auckland   | Kepa Bush (KB)        | 66             | -36.864341 | 174.829175 | 11.3        | 19.0        | 15.2         | 194.17                | 135.71               | 1213.2                    | 176.2       | 25                  |
|            | Puhinui (PU)          | 59             | -36.996244 | 174.832138 | 11.8        | 18.9        | 15.4         | 168.40                | 121.00               | 1125.2                    | 122.6       | 19                  |
|            | Waiheke Island (WI)   | 62.5           | -36.824580 | 175.138752 | 11.3        | 18.8        | 15.2         | 194.17                | 135.71               | 1213.2                    | 162.3       | 31                  |
| Kaipara/   | Whangarei (WH)        | 100            | -35.836300 | 174.305880 | 11.8        | 19.7        | 15.8         | 188.70                | 131.35               | 1299.9                    | 140.6       | 23                  |
| Northland  | Mataia (K1)           | 47             | -36.493261 | 174.419052 | 10.2        | 18.8        | 14.5         | 184.81                | 134.94               | 1435.5                    | 268.4       | 37                  |
|            | Mataia (K2)           | 17             | -36.490327 | 174.415294 | 10.2        | 18.8        | 14.5         | 184.81                | 134.94               | 1435.5                    | 219.4       | 39                  |
|            | Makarau (M)           | 69             | -36.547583 | 174.465691 | 10.2        | 18.8        | 14.5         | 184.81                | 134.94               | 1435.5                    | 216         | 38                  |
|            | Warkworth (W1)        | 100            | -36.398819 | 174.670513 | 10.2        | 18.8        | 14.5         | 184.81                | 134.94               | 1435.5                    | 175.5       | 25                  |
|            | Warkworth (W2)        | 94             | -36.402461 | 174.675336 | 10.2        | 18.8        | 14.5         | 184.81                | 134.94               | 1435.5                    | 185         | 19                  |
|            | Puhoi (P)             | 9              | -36.523405 | 174.676750 | 10.2        | 18.8        | 14.5         | 184.81                | 134.94               | 1435.5                    | 217.6       | 30                  |
|            | Paparoa (PA)          | 71             | -36.114686 | 174.229697 | 10          | 19.1        | 14.5         | 190.96                | 137.39               | 1442.8                    | 161.2       | 37                  |
| Coromandel | Kauaeranga River (KA) | 72             | -37.149852 | 175.548430 | 10.6        | 19.5        | 15.0         | 170.22                | 118.22               | 1141.4                    | 166.4       | 18                  |
| Peninsula  | Oturu (O)             | 75             | -37.028222 | 175.833086 | 10.1        | 19.3        | 14.7         | 212.56                | 142.56               | 1839.8                    | 103.2       | 26                  |
|            | Orchard Point (OP)    | 27             | -37.036219 | 175.842200 | 10.1        | 19.3        | 14.7         | 212.56                | 142.56               | 1839.8                    | 112         | 24                  |
|            | Piako Rover (PI)      | 77             | -37.201483 | 174.676750 | 10.6        | 19.5        | 15.0         | 170.22                | 118.22               | 1141.4                    | 135.1       | 20                  |

<https://doi.org/10.1371/journal.pone.0180525.t001>

to adequately characterise species composition (Fig 2), because the accumulation curve reached a plateau as sample size increased. Multiple regression analysis was used to evaluate the relationship between species richness (R) and environmental variables (including DBH). Automatic forward selection was done on untransformed data. Secondly, correlation coefficients were calculated for each pair of environmental variables using Pearson's test. Regression and correlation analyses were done using Minitab (Version 17). Thirdly, multivariate analyses were conducted to explore patterns between sites, species and measured environmental variables. For these analyses, untransformed frequency of occurrence was used as an abundance measure, which ranged from 0 to 1 in intervals of 0.1 (preliminary analysis indicated that transformation had little effect on ordinations). We considered frequency of occurrence to be preferable to utilising the cover measurements which were both difficult to reliably estimate (given the spatial complexity of the host tree), and difficult to translate into values that can be used for analysis purposes [35]. Multi-Dimensional Scaling (MDS) was done to determine similarities between sites using the Bray-Curtis method (Primer, Version 6). Redundancy Analysis (RDA) was done using CANOCO Version 4.5 [36]. RDA was used to determine the

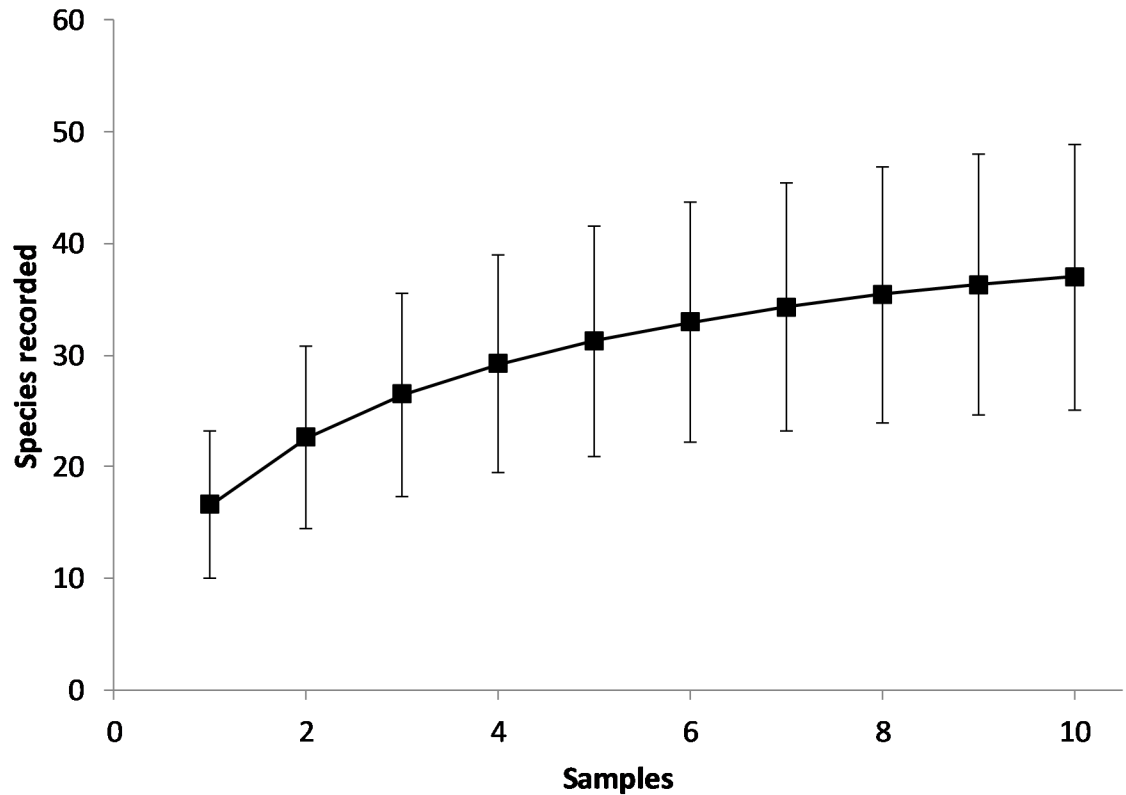

**Fig 2. Example of a representative species accumulation curve (site K1).** All other sites followed a similar pattern. Error bars represent standard deviation.

<https://doi.org/10.1371/journal.pone.0180525.g002>

relationship between the environmental variables and species composition for both sites and individual species. Use of a linear method was confirmed from a preliminary analysis. Environmental variables were selected using an iterative manual selection process in order to establish the most parsimonious model. Only variables that significantly influenced species composition were added to the model during the stepwise selection process. CANODRAW Version 4.14 was used to generate site/environment and species/environment biplots.

## Results

A total of 106 species of lichenized fungi within 45 genera were collected from the 200 trees sampled across the 20 sites in this study (S1 Table). The most represented family of lichens found on mangroves was the Parmeliaceae with sixteen species, followed by the Physciaceae and Lobariaceae with 15 and 13 species respectively. The most common genera were *Pseudocyphellaria*, *Pertusaria*, and *Heterodermia* with seven, *Ramalina* with six, and *Parmotrema* with five species respectively. Species richness per site ranged from 18 at the Kauaeranga River (KA) on the Coromandel Peninsula to 39 at Mataia (K2) in the Kaipara Harbour (Fig 3; S1 Table).

The most common lichen species were *Parmotrema reticulatum*, which occurred at all sites and both *Pertusaria melaleucooides* and *Parmotrema crinitum* which were recorded at 18 sites. Other common species were *Pannaria elixii*, *Physcia tribacoides*, and *Heterodermia japonica*. Of all the species identified, two were 'Nationally Endangered', five were 'Naturally Uncommon', twenty-seven were 'Data Deficient', sixty-nine were 'Not Threatened' following the

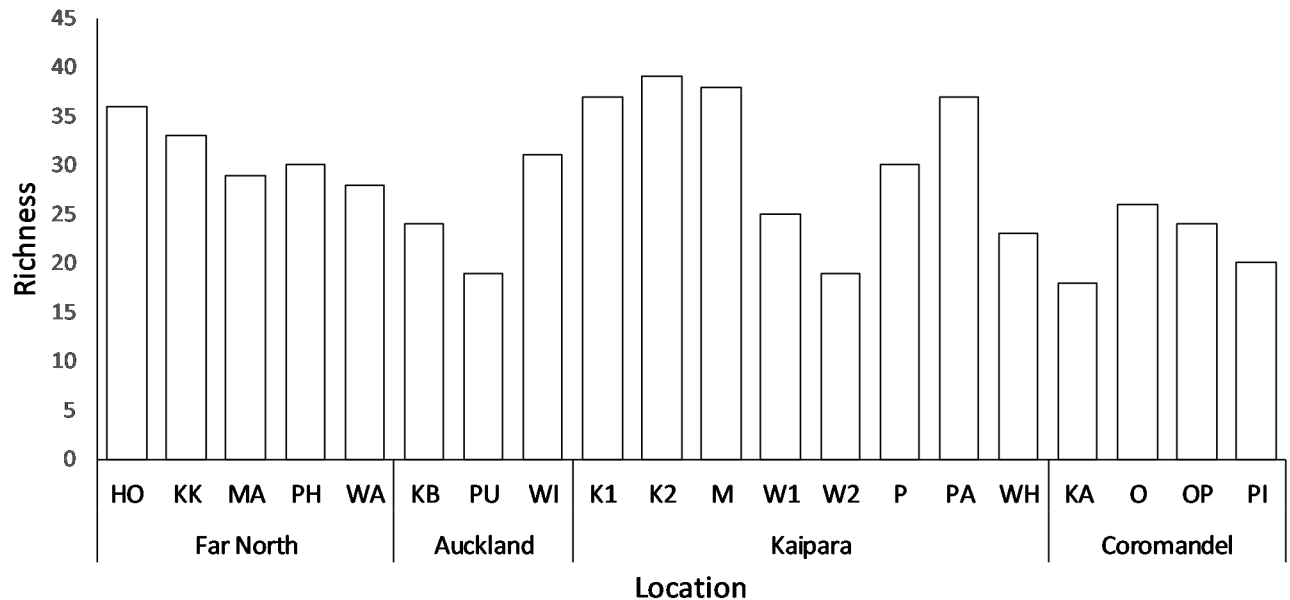

**Fig 3. Species richness of each site surveyed within four areas of the North Island, New Zealand.**

<https://doi.org/10.1371/journal.pone.0180525.g003>

designations from the most recent conservation threat classification assessment [21]. Four taxa were unable to be identified to species level, and one (*Pertusaria puffina*) has been added to the New Zealand lichen flora since publication of the threat classification for lichens [21, 37] (S1 Table). The ‘Nationally Endangered’ *Ramalina pacifica*, was found at seven sites. ‘Naturally Uncommon’ species, such as *Ramalina canariensis*, *Crocodia poculifera*, and *Pseudocyphellaria wilkinsii* were uncommon, although *P. wilkinsii* was found to be locally common at two of the sites where it occurred.

Some ‘Data Deficient’ lichen species were relatively common, such as *Pertusaria melaleucoides*, *Physcia tribacoides*, and *Leptogium cyanizum*. Others, such as *Lecanora argentata*, *Amandina diorista*, and *Thelotrema circumscriptum* were only rarely observed. In the genus *Leptogium* two ‘Data Deficient’ species (*L. cyanizum* and *L. phyllocarpum*) were relatively common, whilst two ‘Not Threatened’ species (*L. aucklandicum*, and *L. cyanescens*) were only rarely seen, and observed at one site each. Three ‘Data Deficient’ species in the genus *Pyrenula* were observed, with two species (*P. nitidula*, and *P. dermatodes*) present at over a quarter of all study sites (where they were commonly found). *P. ravenelii* was observed in abundance at two sites only.

Multiple regression analysis indicated that DBH and mean annual rain days positively influenced site species richness ( $R = -32.5 + 0.1069 \text{ DBH} + 0.222 \text{ rain days}$ ,  $P_{\text{DBH}} = 0.001$ ,  $P_{\text{rain days}} = 0.025$ ). Mangrove mean DBH ranged from 103.2mm at site O (Oturu, Coromandel Peninsula) to 268.4mm at site K1 (Mataia, Kaipara Harbour). Mean annual rain days ranged from 168.4 at PU (Puhinui, Manukau Harbour) to 212.56 at O and OP (Orchard Point, Coromandel Peninsula).

Environmental variables were generally not correlated (Table 2), although latitude, longitude, mean air, min. air, max. rain and wet days showed some correlation with other variables. MDS analysis indicated that there was similarity between sites from the same regional location, as clusters were generally formed (Fig 4). In particular, Kaipara Harbour/mid Northland sites showed distinct similarity and formed a recognizable cluster, with the exception of sites W2 and WH. Far North sites also formed a cluster (albeit less distinct), representing the northern-

**Table 2. Bivariate correlations (Pearson) between environmental variables.** Significant correlations at 5% indicated by \* and 1% by \*\* respectively.

|           | Lat. | Long.  | Cover | DBH     | Mean air | Max. air | Min. air | Max. rain | Wet days | Rain days |
|-----------|------|--------|-------|---------|----------|----------|----------|-----------|----------|-----------|
| Lat.      | -    | 0.90** | -0.24 | -0.37   | -0.56*   | -0.55*   | -0.42    | -0.24     | -0.31    | -0.18     |
| Long.     |      | -      | -0.13 | -0.58** | -0.45*   | -0.24    | -0.44    | -0.02     | -0.29    | 0.07      |
| Cover     |      |        | -     | -0.27   | 0.30     | 0.38     | 0.20     | -0.09     | -0.13    | -0.03     |
| DBH       |      |        |       | -       | -0.15    | -0.20    | 0.09     | -0.04     | 0.21     | -0.15     |
| Mean air  |      |        |       |         | -        | 0.65**   | 0.93**   | -0.28     | 0.00     | -0.03     |
| Max. air  |      |        |       |         |          | -        | 0.32     | 0.25      | -0.07    | 0.29      |
| Min. air  |      |        |       |         |          |          | -        | -0.50*    | 0.01     | -0.22     |
| Max. rain |      |        |       |         |          |          |          | -         | 0.46*    | 0.81**    |
| Wet days  |      |        |       |         |          |          |          |           | -        | 0.68**    |
| Rain days |      |        |       |         |          |          |          |           |          | -         |

<https://doi.org/10.1371/journal.pone.0180525.t002>

most sites studied. Coromandel sites and one of the Auckland sites (PU) also formed a diffuse cluster, representing the southern-most sites within the study. The stress value of 0.14 indicated that the analysis showed reasonable fit in two dimensions.

Redundancy analysis indicated that wet days ( $P = 0.002$ ), latitude ( $P = 0.002$ ) and DBH ( $P = 0.008$ ) were good predictors of variability in species composition (Fig 5). In general, sites from the same region (and latitude) clustered together, but, not consistently. For example, distinct clustering of sites were evident (Fig 5A) for Northland sites (KK, MA, WA and PH, but, not HO), and the mid-Northland/Kaipara Harbour sites (PA, K1, K2, P, M, W1, W2, but, not WH). Two of the Coromandel sites (PI, KA) formed a cluster with one of the Auckland sites (PU) and two of the Auckland sites (KB and WI) clustered with the two eastern Coromandel sites (O and OP). The first two ordination axes accounted for 25.5% (16% and 9.5% respectively) of the observed variability in species composition (Fig 5B). Sixteen species were strongly

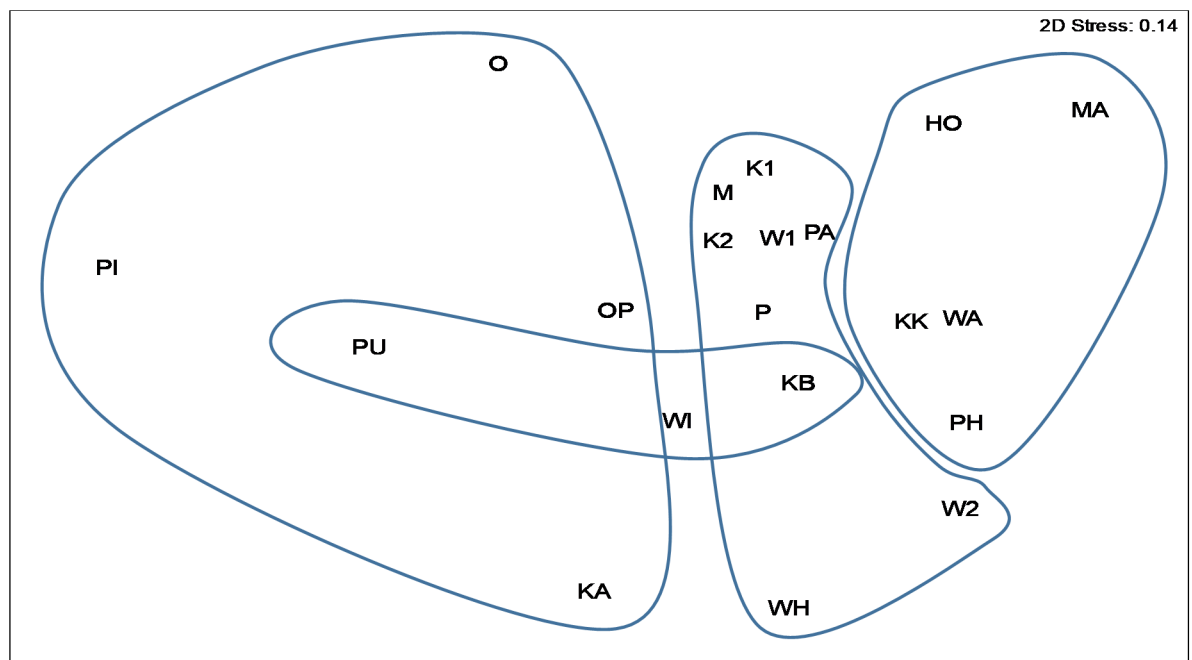

**Fig 4. MDS plot of sites within the regions Northland (HO, KK, MA, PH, WA). Auckland (KB, PU, WI), Kaipara (K1, K2, M, W1, W2, P, PA, WH) and Coromandel (KA, O, OP, PI). Region boundaries shown for clarity.**

<https://doi.org/10.1371/journal.pone.0180525.g004>

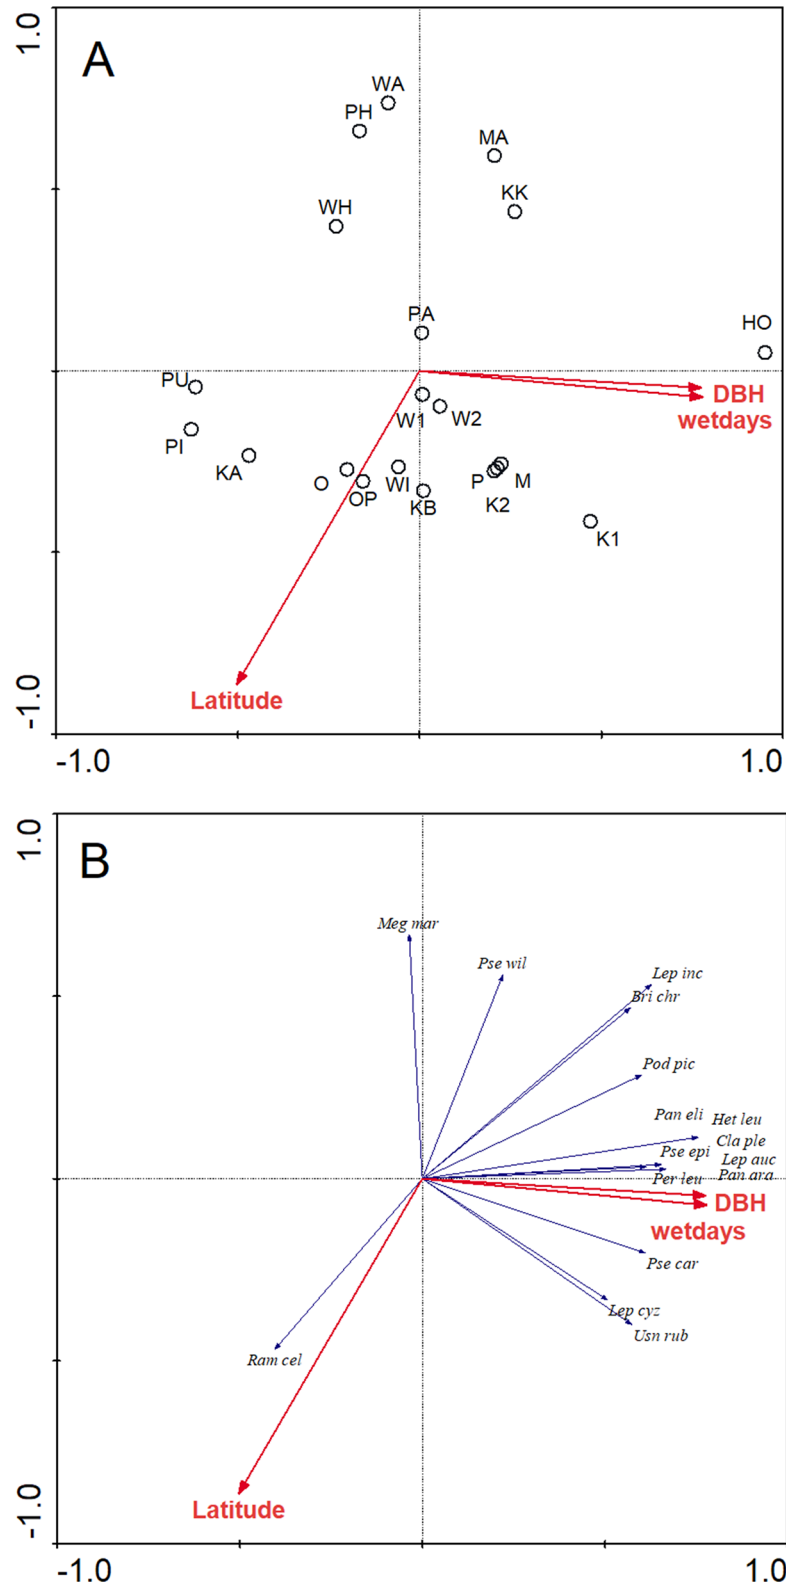

**Fig 5. RDA ordination plots representing relationships between influential environmental variables and sites (A) and species (B) respectively.** In the species diagram, only the sixteen species most strongly influenced by the environmental variables are displayed for clarity.

<https://doi.org/10.1371/journal.pone.0180525.g005>



influenced by these variables and were selected for inclusion in the species/environment plot. Fifteen species were positively related to both DBH and mean annual wet days, whilst one species (*Ramalina celastri*) was associated with increasing latitude.

## Discussion

One hundred and six species of lichens found in New Zealand mangrove forest equates to c. 6% of the known NZ lichen Flora [21], indicating that this forest type is an important habitat type for lichen diversity. Out of 38 species listed as occurring on mangroves in the most recent Flora treatment for New Zealand lichens [30], 20 were identified during this study. More species are therefore likely to be added to the checklist as more sites are investigated.

Unlike most mangrove forests, New Zealand mangrove forests are a monoculture of one tree species. Despite this, when compared with studies elsewhere in the world, the number of lichen species found in New Zealand mangroves is relatively high (as a proportion of those extant within the country). The highest recorded number of species of lichens on mangroves was recorded from a study of the southern and south-eastern coastline of Brazil, where 289 lichen taxa were reported [38]. One hundred and sixty-seven species are known from the Sundarban mangroves [39], an area of over 1 million hectares and 30–36 species of mangroves [40, 41]. An investigation of the mangroves of Trat province in southeast Thailand, which hosts 33 species of true mangroves, reported 117 species of lichens. These were found on the trunks and prop roots, and the majority of lichen species were crustose [42]. In a study of mangroves of eastern Australia, where seven species of mangroves, including *Avicennia marina*, were examined, 105 lichen species were observed [16]. However, this study focused on macrolichens, so the total number present is likely to be higher.

Other studies observed lichen richness that were generally similar to observations at individual sites in New Zealand. Twenty-nine lichen species were recorded from the Andaman Island mangroves in India [18], 21 species from mangroves on the southeast coast of India [21], seven species from Caye Caulker, Belize [43], whilst two species were recorded from Jozani-Pete mangrove creek, Zanzibar, Tanzania [44].

Patterns in lichen epiphyte diversity can be viewed as the result of interaction between environmental and habitat factors (environmental gradients, substrate tree specificity, tree size, tree age, bark characteristics) and the ability of each lichen species to disperse [45]. In our study, two variables, DBH and mean annual rain days, had a measurable effect on species richness. DBH is often used as a proxy measure of tree age [46] or overall size [47]. Variation in the diameter of the trunk of a tree affects available surface area, but also may influence the variability of the surface (bark texture and pH, water availability, presence of holes or cracks [48] and probably acts as a proxy measure of age. The positive influence of tree diameter on lichen species richness has been noted in other studies, but, not so far in studies on mangrove forests. For example, lichen species richness has been found to be greater in Mediterranean *Quercus* forest remnants where the average tree diameters were greater [49]. Similarly, a positive linear effect of trunk diameter on lichen species richness has been reported for deciduous tree stands in southern Sweden [50]. However, there is not always a clear link between tree diameter and lichen species richness. For example a study of montane rainforest in Cuba found differences in lichen species composition in relation to tree trunk diameter for one tree species, but did not observe differences for species richness, frequency or cover area [51].

Mean annual rain days (those days with 0.1mm or more of precipitation) positively influenced site species richness but maximum rainfall did not. Sites with higher mean annual number of rain days generally had more lichen species present (Table 1). The relationship between lichen growth and moisture levels is an interesting one. Lichens are poikilohydric; they cannot

regulate their own water content [52]. Different lichen species obtain moisture from rain, mist, dew or high humidity [53], and most can survive periods of desiccation. As lichens dry out, the rate of photosynthesis and respiration declines until rehydration of the lichen thallus occurs [52]. Many lichens appear to function more efficiently obtaining water from dew rather than rain, and excess water can actually inhibit photosynthesis [53]. Regular small amounts of mist or rain could therefore be more optimal for the growth of most lichen species than irregular heavy rainfall events, which may explain the lack of correlation between species richness and maximum rainfall. Mean annual rain days influenced the occurrence of a number of lichen species on mangroves in Eastern Australia [16].

MDS analysis showed that sites from the same region generally formed distinct clusters (Fig 4) and the RDA identified that wet days, latitude and DBH were predictors of species composition (Fig 5). While there was a large degree of overlap in species occurrences between sites (S1 Table), some lichen species were more commonly observed at certain sites, whilst some were absent. For example, *Flavoparmelia haywardiorum* was characteristic of the majority of the Kaipara Harbour sites, and was not found elsewhere. Other species that seemed to characterise the mangroves of the Kaipara harbour included *Leptogium cyanizum* and *L. phyllocarpum*, *Pertusaria sorodes* and *Dufourea ligulata*. This last species is an unusual occurrence, as it is usually saxicolous [30], but, it is possible that the hard bases of the trunks of mangroves are providing a similar microhabitat to that of coastal rocks. Also of note was the high diversity of species in the Lobariaceae at Kaipara sites, with seven species present. The Coromandel Peninsula sites are perhaps best characterised by what is missing. There were no *Opegrapha* species, *Ochrolechia pallescens* was absent and the Lobariaceae were also largely absent. Characteristically “northern” species of *Ramalina*, such as *R. australiensis* and *R. pacifica* [29] were also not found at these sites.

A range of possible explanatory variables for the lichen assemblages observed were examined, but, redundancy analysis revealed that only three environmental variables (DBH, latitude and mean annual wet days) were predictors of species and site composition. The causal relationships remain unknown from this study, but, these patterns are presumably driven by climatic variations which favour certain species at given geographical locations. Similarly, species assemblages were reported to change with latitude in Australia as species replaced each other through turnover [16].

As well as finding a relationship between the environmental variables DBH and mean annual rain days with species richness, our study also demonstrated that DBH measurably influenced species composition. This has been noted in other studies of epiphytic lichens. For example, a study of epiphytic lichens in the Italian alps found that after substrate tree specificity was taken into account, tree size (DBH) and age influenced lichen species dynamics [47]. They observed that tree size affected population sizes and abundance patterns, and tree age had species-specific effects as some species prefer older or younger trees. It has been suggested that the relationship between lichen species composition and trunk diameter could be due to trees with larger trunks having more suitable microclimates on the bark and a larger surface area available for colonising lichen propagules [51]. Unfortunately, tree ages for the mangrove species used in this study could not be determined by counting tree rings [54].

Whilst mean annual rain days influenced site species richness, we observed that the number of mean annual wet days influenced species composition. Moisture levels are therefore a strong driver of the species distributions that we observed. The preference of different lichen species for different moisture levels is known to depend on a range of factors. Cyanolichens generally require liquid water for photosynthesis, whereas lichens with green algal photobionts often do not [52, 53]. In addition, fine, filamentous or fruticose lichens can take up moisture from mist or humid air rapidly, but, more compact or thicker foliose lichens may not [53] and may

require liquid water to rehydrate. For example, members of the Lobariaceae such as *Pseudocyphellaria* and *Sticta* are adapted to rainier climates [53, 55]. It could be expected that sites with a high number of wet days would be richer in cyanolichens and foliose lichens such as species of Lobariaceae. This is indeed the case (S1 Table) in this study, with cyanobacterial species of *Leptogium* and *Pannaria*, and species of *Crocodia*, *Pseudocyphellaria* and *Sticta* (Lobariaceae) well-represented at these sites. The most comparable study available [16] did note several cyanolichens but no species of Lobariaceae from eastern Australian mangroves. All of the sites in the Australian study had significantly lower mean annual rain days than the sites in our study.

Some individual species were strongly influenced by environmental variables. Species such as *Heterodermia leucomela*, *Leptogium aucklandicum*, *Leptogium cyanizum*, *Pannaria elixii*, *Pannaria araneosa*, *Pertusaria leucomela*, *Pseudocyphellaria carpoloma* and *Usnea rubicunda* were strongly positively associated with DBH and mean annual wet days. Four of these species are cyanolichens (in this case species of *Leptogium* and *Pannaria*). The presence of lichens with cyanobacterial symbionts has previously been found to correlate with tree size [49] and cyanolichens are usually associated with wetter habitats [30, 52, 53].

*Ramalina celastri* was more evident with increasing latitude, whilst *Brigantiaea chrysosticta*, *Lepraria incana*, *Megaloblastenia marginiflexa* and *Pseudocyphellaria wilkinsii* were more evident with decreasing latitude. However, it should be noted that most of these species are found throughout New Zealand [30], and most are also found on trees other than mangroves [30, 56]. Only one lichen recorded in our study, *Caloplaca mooreae* is likely to be a mangrove-specialist.

There are other possible explanations for differences in site species assemblages. Forest continuity (the continuous occupation of a site for multiple generations), can have an effect on species richness and community composition. For example, in beech forests in southern Sweden, older stands with continuous forest through time and high substrate quantity and quality were linked to higher lichen species richness [57]. Mangrove forests are highly dynamic ecosystems, and forest continuity, whether spatial or temporal is probably not the norm. Most mangrove forests have a low, dense, shrubland of seedlings and saplings, with scattered larger, older trees, often at or above the high tide level [54, 58, 59]. As mangrove forests age, they are usually characterised by scattered large trees, canopy gaps, standing dead trees and little regeneration [60]. These sites are likely to have a high lichen diversity when compared with stands of mangrove saplings, which often do not support lichens at all. In New Zealand, mangroves have been spreading rapidly in the last 80 years due to increased sediment loads in estuaries caused by the expansion of agriculture and urbanisation [5, 9, 26, 54, 59]. The distribution, abundance and size of individual mangroves has been found to vary within and between different estuaries [58], and suitable estuarine sites are not evenly distributed in the upper North Island [26], leading to some significant distributional gaps. Large scale mortality of mangrove forests can be caused by storms, tsunamis, changes in local hydrology or salinity, erosion, frost and disease [60]. The instability through time and geographical separation of these older trees, when combined with the variable ability of different lichen species to disperse over long distances, could therefore be influencing site species richness and community composition.

Another variable not investigated in our study was the possible influence of atmospheric pollutants, in particular nitrogen in the form of ammonia. Agricultural areas with high numbers of cattle can have high background levels of ammonia, and this is known to affect lichen community composition and reduce species richness at high concentrations [61–63]. Lichen species can be categorised as nitrophytes, oligophytes or acidophytes [62, 64, 65], with acidophytes generally declining as levels of ammonium increase, and nitrophytes being favoured. Most research on the effects of ammonia on lichen diversity has been done in the Northern Hemisphere, but some of the same species are found in New Zealand. Site PI, for example,

might be an example of a site influenced by atmospheric nitrogen. This site is located in the Firth of Thames at the mouth of the Piako River, which flows through an extensive flood plain area that is heavily farmed. Three species listed as being nitrophytes in Europe [63, 65] *Hyperphyscia adglutinata*, *Ramalina canariensis* and *Xanthoria parietina* were observed, and cyanolichens were absent. Cyanolichens are known to be particularly sensitive to excess environmental nitrogen [66].

Two 'Nationally Endangered', five 'Naturally Uncommon' and 27 'Data Deficient' species were amongst the 106 species found on mangroves, highlighting the biodiversity importance of this habitat type. Despite mangrove forests increasing in extent in New Zealand, human activities are impacting on habitat quality and there are indications that some lichen species characteristic of mangroves and other coastal forest types may be declining. One species with its stronghold in mangrove forests, *Ramalina pacifica*, already noted as 'Nationally Endangered' [21], was found at less than half of the surveyed sites. Other species such as *Teloschistes flavicans*, previously found in mangrove forests and listed as 'Declining' [21] were not found in any of the 20 study sites. Another previously common species, *Ramalina geniculata*, known to be common in stands of *Avicennia marina* from Auckland northwards [29, 67] was only found at 12 of 20 sites, indicating a possible decline.

## Conclusion

The mean annual number of rain days and tree diameter (DBH) positively influenced lichen species richness at the 20 mangrove forest sites surveyed in this study. There was a distinct similarity in species composition between sites from the same geographical region, and this was influenced by mean annual wet days, DBH and latitude. These results indicate that regular small amounts of precipitation may be more important for lichen diversity than overall rainfall, which did not appear to influence either lichen species richness or site species composition. The high number of lichen species found, and the number of 'Threatened', 'At Risk' or 'Data Deficient' species indicates that these larger mangrove trees are important habitat for lichens and are in need of conservation.

## Supporting information

**S1 Table. Lichen species frequency of occurrence by site.**  
(DOCX)

## Acknowledgments

We are grateful to Gill and Kevin Adshead, Rachel Griffith, Tim Martin and Karina Vizor for access to sites or field assistance. We would like to thank Mel Galbraith for input on the study design, Glenn Aguilar for provision of data, Mark Large and two anonymous reviewers for comments on the manuscript, Jeremy Rolfe for supplying Fig 1 and Peter de Lange, David Galloway, Alan Archer and Jack Elix for assistance with the identification of some species. We thank Unitec Institute of Technology for funding this research.

## Author Contributions

**Conceptualization:** Christy L. Reynolds, Orhan A. H. Er, Dan J. Blanchon.

**Data curation:** Christy L. Reynolds, Orhan A. H. Er, Linton Winder, Dan J. Blanchon.

**Formal analysis:** Linton Winder.

**Funding acquisition:** Dan J. Blanchon.

**Investigation:** Christy L. Reynolds, Orhan A. H. Er, Dan J. Blanchon.

**Methodology:** Christy L. Reynolds, Orhan A. H. Er, Linton Winder, Dan J. Blanchon.

**Project administration:** Dan J. Blanchon.

**Resources:** Dan J. Blanchon.

**Supervision:** Dan J. Blanchon.

**Validation:** Dan J. Blanchon.

**Writing – original draft:** Christy L. Reynolds, Orhan A. H. Er, Linton Winder, Dan J. Blanchon.

**Writing – review & editing:** Christy L. Reynolds, Orhan A. H. Er, Linton Winder, Dan J. Blanchon.

## References

1. Tomlinson PB. The botany of mangroves. Cambridge tropical biology series. 1986.
2. Duke NC. Mangrove floristics and biogeography. In: Robertson AI, Alongi DM, editors. Tropical mangrove ecosystems. Washington DC, USA: American Geophysical Union; 1992 p. 63–100.
3. Kathiresan K, Bingham BL. Biology of mangroves and mangrove ecosystems. *Advances in Marine Biology*. 2001; 40:81–251.
4. Alongi DM. The energetics of mangrove forests. Springer Science & Business Media; 2009
5. Harty C. Mangrove planning and management in New Zealand and South East Australia—A reflection on approaches. *Ocean & Coastal Management*. 2009; 52(5):278–286.
6. Giri C, Ochieng E, Tieszen LL, Zhu Z, Singh A, Loveland T, Masek J, Duke N. Status and distribution of mangrove forests of the world using earth observation satellite data. *Global Ecology and Biogeography*. 2011; 20(1):154–159.
7. Costanza R, d'Arge R, De Groot R, Farber S, Grasso M, Hannon B, Limburg K, Naeem S, O'Neill RV, Paruelo J, Raskin R, Sutton P, Van Den Belt M. The value of ecosystem services: putting the issues in perspective. *Ecological economics*. 1998; 25(1):67–72.
8. Alongi DM. Present state and future of the world's mangrove forests. *Environmental Conservation*. 2002; 29(03):331–49.
9. Lovelock CE, Sorrell BK, Hancock N, Hua Q, Swales A. Mangrove forest and soil development on a rapidly accreting shore in New Zealand. *Ecosystems*. 2010; 13(3):437–451.
10. Polidoro BA, Carpenter KE, Collins L, Duke NC, Ellison AM, Ellison JC et al. (2010). The loss of species: mangrove extinction risk and geographic areas of global concern. *Plos One*. 2010; 5(4): e10095. <https://doi.org/10.1371/journal.pone.0010095> PMID: 20386710
11. Nagelkerken I, Blaber SJM, Bouillon S, Green P, Haywood M, Kirton LG et al. The habitat function of mangroves for terrestrial and marine fauna: a review. *Aquatic Botany*. 2008; 89(2):155–185.
12. Chmura GL, Anisfeld SC, Cahoon DR, Lynch JC (2003). Global carbon sequestration in tidal, saline wetland soils. *Global biogeochemical cycles*. 2003; 17(4):1–12
13. Giesen W, Wulffraat S, Zieren M, Scholten L. Mangrove guidebook for Southeast Asia. Bangkok: FAO Regional Office for Asia and the Pacific; 2007.
14. Morrissey D, Beard C, Morrison M, Craggs R, Lowe M. The New Zealand Mangrove: Review of the Current State Of Knowledge. Auckland Regional Council Technical Publication Number 325; 2007.
15. Taylor R, Smith I (1997). The state of New Zealand's environment. Wellington: Ministry for the Environment. 1997.
16. Stevens GN (1979). Distribution and related ecology of macrolichens on mangroves on the east Australian coast. *The Lichenologist*. 1979; 11(03):293–305.
17. Logesh AR, Upreti DK, Kalaiselvam M, Nayaka S, Kathiresan K. Lichen flora of Pichavaram and Muthupet mangroves (Southeast Coast of India). *Mycosphere*. 2012; 3(6):884–888.
18. Sethy PP, Pandit GS, Sharma BO. Lichens on mangrove plants in Andaman Islands, India. *Mycosphere*. 2012; 3(4):476–484

19. Hayward BW, Hayward GC, Galloway DJ. Lichens of Great Barrier and adjacent islands, northern New Zealand. *Journal of the Royal Society of New Zealand*. 1986; 16(2):121–137.
20. Blanchon D, Kooperberg R, Er O, Reynolds C, Kularatne I. Lichens of the mangroves and shell banks near the Miranda Shorebird Centre, Firth of Thames. *Auckland Botanical Society Journal*. 2013; 68(1):87–88.
21. de Lange PJ, Galloway DJ, Blanchon DJ, Knight A, Rolfe JR, Crowcroft GM, Hitchmough R (2012). Conservation status of New Zealand lichens. *New Zealand Journal of Botany*. 2012; 50(3):303–363.
22. Duke NC, Meynecke JO, Dittmann S, Ellison AM, Anger K, Berger U, et al. A world without mangroves? *Science*. 2007; 317(5834):41–42. <https://doi.org/10.1126/science.317.5834.41b> PMID: 17615322
23. Valiela I, Bowen JL, York JK. Mangrove Forests: One of the World's Threatened Major Tropical Environments. *BioScience*. 2001; 51(10):807–815.
24. Feller IC, Lovelock CE, Berger U, McKee KL, Joye SB, Ball MC. Biocomplexity in mangrove ecosystems. *Annual Review of Marine Science*. 2010; 2:395–417. <https://doi.org/10.1146/annurev.marine.010908.163809> PMID: 21141670
25. Dahdouh-Guebas F, Koedam N. Long-term retrospection on mangrove development using transdisciplinary approaches: a review. *Aquatic Botany*. 2008; 89(2):80–92.
26. de Lange WP, de Lange PJ. An appraisal of factors controlling the latitudinal distribution of mangrove (*Avicennia marina* var. *resinifera*) in New Zealand. *Journal of Coastal Research*. 1994; 10:539–548.
27. Alfaro AC, Thomas F, Sergent L, Duxbury M. Identification of trophic interactions within an estuarine food web (northern New Zealand) using fatty acid biomarkers and stable isotopes. *Estuarine, Coastal and Shelf Science*. 2006; 70(1):271–86.
28. Gladstone-Gallagher RV, Lundquist CJ, Pilditch CA. Mangrove (*Avicennia marina* subsp. *australasica*) litter production and decomposition in a temperate estuary. *New Zealand Journal of Marine and Freshwater Research*. 2014; 48(1):24–37.
29. Bannister P, Bannister JM, Blanchon DJ. Distribution, habitat, and relation to climatic factors of the lichen genus *Ramalina* in New Zealand. *New Zealand Journal of Botany*. 2004; 42(1):121–138.
30. Galloway DJ. *Flora of New Zealand: Lichens, including lichen-forming and lichenicolous fungi*, Vol 1 and 2. Lincoln: Manaaki Whenua Press. 2007.
31. Ódor P, Király I, Tinya F, Bortignon F, Nascimbene J. Patterns and drivers of species composition of epiphytic bryophytes and lichens in managed temperate forests. *Forest Ecology and Management*. 2014; 321:42–51.
32. Aptroot A. A world key to the species of *Anthracothecium* and *Pyrenula*. *The Lichenologist*. 2012; 44(01):5–53.
33. Galloway DJ, Elix JA. Reinstatement of *Crocodia* Link (Lobariaceae: Ascomycota) for five species formerly included in *Pseudocyphellaria* Vain. *Australasian Lichenology*. 2013; 72:32–42.
34. Moncada B, Lücking R, Suárez A. Molecular phylogeny of the genus *Sticta* (lichenized Ascomycota: Lobariaceae) in Colombia. *Fungal Diversity*. 2014; 64(1):205–231.
35. Leps J, Šmilauer P. *Multivariate Analysis of Ecological Data using Canoco*. Cambridge University Press; 2003.
36. ter Braak CJF, Šmilauer P. *CANOCO Reference Manual and CanoDraw for Windows User's Guide: Software for Canonical Community Ordination (version 4.5)*. Ithaca NY, USA; Microcomputer Power. 2002. 500 pp.
37. Er O, Reynolds C, Blanchon DJ. Additional lichen records from New Zealand 49. *Pertusaria puffina* A. W.Archer & Elix. *Australasian Lichenology*. 2015; 77:28–31.
38. Marcelli MP. *Ecologia Liquenica nos Manguezias do Sul-Sudeste Brasileiro*. Bibliotheca Lichenologica. 1992; 47:1–288.
39. Logesh AR, Kalaiselvam M, Upreti DK, Nayaka S, Kathiresan K. Mangroves—An abode for unique lichens. *Coastal ecosystems of India, special publication*. Annamalai University: Parangipettai; 2013. 39–44.
40. Santra SC. Mangrove lichens. *Indian Biologist*. 1998; 30(2):76–78.
41. Gopal B, Chauhan M. Biodiversity and its conservation in the Sundarban Mangrove Ecosystem. *Aquatic Sciences*. 2006; 68:338–354.
42. Mongkolsuk P, Buaruang K, Polyiam W, Vongshewarat K, Phokaeo S, Seeiam D et al. Lichen in Mangrove forest at Ban Pak Klong Num Chiew Mueng district, and Black Sand Beach Laem Ngob District, Trat Province. 37th Congress of Science and Technology of Thailand; Bangkok. 2011
43. Barclay-Estrup P. Lichens of *Cocos nucifera* on Caye Caulker, Belize. *The Lichenologist*. 1992; 24(03):249–254.



44. Akil JM, Jiddawi NS. A preliminary observation of the flora and fauna of Jozani-Pete mangrove creek, Zanzibar, Tanzania. Proceedings of the 20th Anniversary Conference on Advances in Marine Science in Tanzania; Jun 28-July 1; Zanzibar, Tanzania. IMS, WIOMSA; 1999.
45. Ellis CJ. Lichen epiphyte diversity: a species, community and trait-based review. Perspectives in Plant Ecology, Evolution and Systematics. 2012; 14:131–152.
46. Altman J, Dolezal J, Cizek L. Age estimation of large trees: New method based on partial increment core tested on an example of veteran oaks. Forest Ecology and Management. 2016; 380:82–89.
47. Nascimbene J, Ackermann S, Dainese M, Garbarino M, Carrer M. Fine-scale population dynamics help to elucidate community assembly patterns of epiphytic lichens in alpine forests. Fungal Ecology. 2016; 24:21–26.
48. Ranius T, Johansson P, Berg N, Niklasson M. The influence of tree age and microhabitat quality on the occurrence of crustose lichens associated with old oaks. Journal of Vegetation Science. 2008; 19:653–662.
49. Aragon G, Martinez I, Izquierdo P, Belinchon R, Escurado A. Effects of forest management on epiphytic lichen diversity in Mediterranean forests. Applied Vegetation Science. 2010; 13:183–194.
50. Johansson P, Rydin H, Thor G. Tree age relationships with epiphytic lichen diversity and lichen life history traits on ash in southern Sweden. Ecoscience. 2007; 14:81–91.
51. Rosabal D, Burgaz AR, & De la Masa R. Diversity and distribution of epiphytic macrolichens on tree trunks in two slopes of the montane rainforest of Gran Piedra, Santiago de Cuba. The Bryologist. 2010; 113(2): 313–321.
52. Palmqvist K. Carbon ecology in lichens. New Phytologist. 2000; 148:11–36.
53. Gauslaa Y. Rain, dew, and humid air as drivers of morphology, function and spatial distribution in epiphytic lichens. The Lichenologist. 2014; 46:1–16.
54. Burns BR, Ogden J. The demography of the temperate mangrove (*Avicennia marina* (Forsk.) Vierh.) at its southern limit in New Zealand. Australian Journal of Ecology. 1985; 10:125–133.
55. Green TGA, Lange OL. Ecophysiological adaptations of the lichen genera *Pseudocyphellaria* and *Sticta* to south temperate rainforests. Lichenologist. 1991; 23:267–282.
56. Galloway DJ. Flora of New Zealand. Lichens. Wellington: Government Printer; 1985. 662p.
57. Fritz O, Gustafsson L, Larsson K. Does forest continuity matter in conservation?—A study of epiphytic lichens and bryophytes in beech forests of southern Sweden. Biological Conservation. 2008; 141:655–668.
58. Osunkoya OO, Creese RG. Population structure, spatial pattern and seedling establishment of the grey mangrove, *Avicennia marina* var. *australasica*, in New Zealand. Australian Journal of Botany. 1997; 45:707–725.
59. Young BM, Harvey LE. A spatial analysis of the relationship between mangrove (*Avicennia marina* var. *australasica*) physiognomy and sediment accretion in the Hauraki Plains, New Zealand. Estuarine, Coastal and Shelf Science. 1996; 42:231–246.
60. Jiménez JA, Lugo AE. Tree mortality in mangrove forests. Biotropica. 1985; 17:177–185.
61. van Herk CM, Mathijssen-Spiekman EAM, de Zwart D. Long distance nitrogen air pollution effects on lichens in Europe. Lichenologist. 2003; 35:347–360.
62. Wolseley PA, James PW, Theobald MR, Sutton MA. Detecting changes in epiphytic lichen communities at sites affected by atmospheric ammonia from agricultural sources. Lichenologist. 2006; 38:161–176.
63. Wolseley PA, Stoffer S, Mitchell R, Truscott A-M, Vanbergen A, Chimonides J, Scheidegger C. Variation of lichen communities with land use in Aberdeenshire, UK. Lichenologist. 2006; 38:307–322.
64. van Herk CM. Mapping of ammonia pollution with epiphytic lichens in the Netherlands. Lichenologist. 1999; 31:9–10.
65. Pinho P, Theobald MR, Dias T, Tang YS, Cruz C, Martins-Loução MA, Máguas C, Sutton M, Branquinho C. Critical loads of nitrogen deposition and critical levels of atmospheric ammonia for semi-natural Mediterranean evergreen woodlands. Biogeosciences. 2012; 9:1205–1215.
66. Geiser LH, Neitlich PN. Air pollution and climate gradients in western Oregon and Washington indicated by epiphytic macrolichens. Environmental Pollution. 2007; 145:203–218. <https://doi.org/10.1016/j.envpol.2006.03.024> PMID: 16777297
67. Blanchon DJ, Braggins JE, Stewart A. The lichen genus *Ramalina* in New Zealand. Journal of the Hattori Botanical Laboratory. 1996; 79:43–98.
